# Supplementary material for: Vitamin A Metabolism by Dendritic Cells Triggers an Antimicrobial Response against Mycobacterium tuberculosis
Source: PubMed Central journal article supplement (PMC6553556; doi:10.1128/msphere.00327-19), 2019-06-05

Figure S4

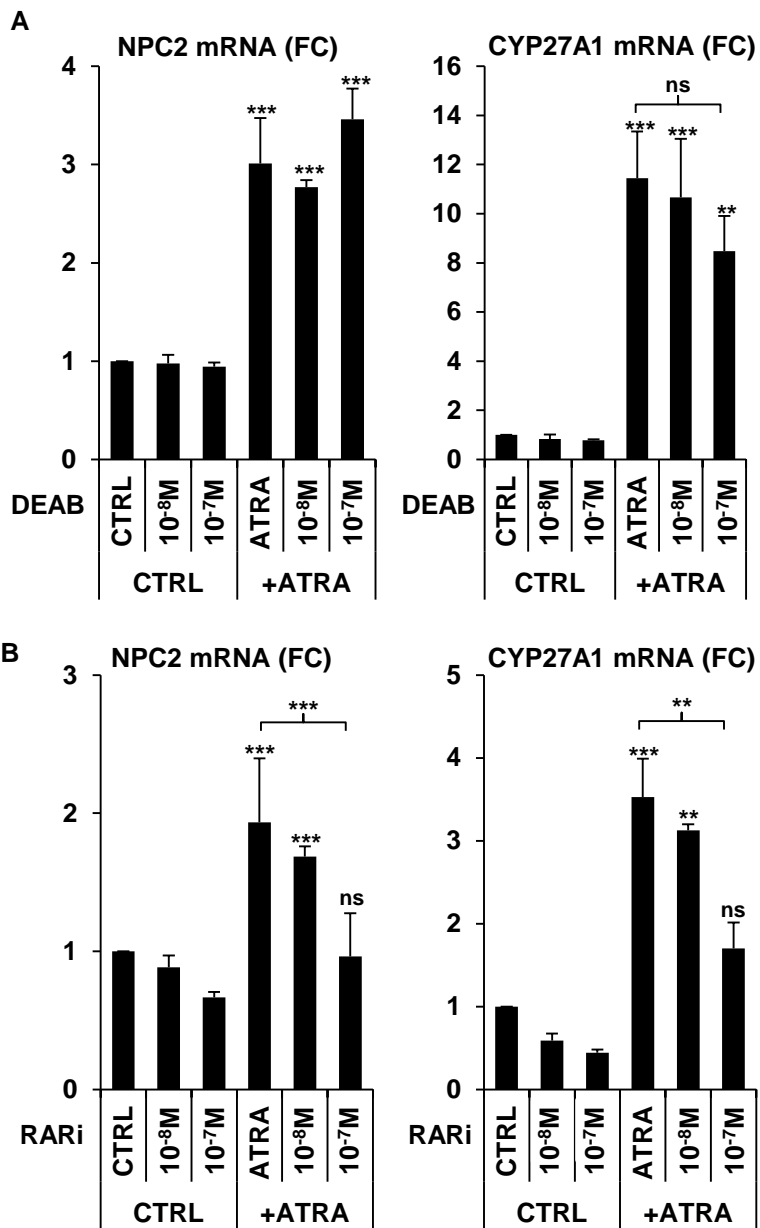

Supplement: mSphere.00327-19-sf004.pdf [file mSphere.00327-19-sf004.pdf]
